# Supplementary material
Source: PubMed Central journal article supplement (PMC7536630)
Supplement: jamaneurol-e203502-s001.pdf [file jamaneurol-e203502-s001.pdf]

## Supplementary Online Content

Braithwaite T, Subramanian A, Petzold A, et al. Trends in optic neuritis incidence and prevalence in the UK and association with systemic and neurologic disease. *JAMA Neurol*. Published online October 5, 2020. doi:10.1001/jamaneurol.2020.3502

**eTable 1.** Read Codes Included in Case Definition of Optic Neuritis

**eTable 2.** Time Trend Analysis of the Point Prevalence and Annual Incidence of Optic Neuritis (per 100,000 People) in the UK Between 1997 and 2018

**eFigure 1.** Annual Point Prevalence of Optic Neuritis in the UK Population (per 100,000 People, With 95% Confidence Intervals) Between 1997 and 2018

**eFigure 2.** Nelson-Aalen Cumulative Hazard Curves (With 95% Confidence Intervals [CI]) for Diagnosis of Incident Multiple Sclerosis During 15 Years of Follow-up, Comparing Patients Diagnosed With Incident Optic Neuritis A) Aged <17 Years, B) Aged 18-50 Years, and C) Aged >50 Years

**eFigure 3.** Nelson-Aalen Cumulative Hazard Curves (With 95% Confidence Intervals [CI]) for Diagnosis With Incident Systemic, Neurological or Infectious IMID in Optic Neuritis Patients Compared to Controls During 15 Years of Follow-up

This supplementary material has been provided by the authors to give readers additional information about their work.

**eTable 1.** Read Codes Included in Case Definition of Optic Neuritis

| Read code    | Description                                              | Frequency amongst cases |
|--------------|----------------------------------------------------------|-------------------------|
|              |                                                          | % (n)                   |
| F4H3.00      | Optic neuritis                                           | 76.2 (2206)             |
| F4H3200      | Acute retrobulbar neuritis                               | 14.0 (406)              |
| F4H3000      | Unspecified optic neuritis                               | 5.49 (159)              |
| F4H3z00      | Optic neuritis NOS                                       | 2.7 (77)                |
| A36y000      | Meningococcal optic neuritis                             | 0.9 (27)                |
| A94y300      | Syphilitic optic atrophy                                 | 0.4 (12)                |
| A94y400      | Syphilitic retrobulbar neuritis                          | 0.2 (5)                 |
| FyuJ100      | [X]Retrobulbar neuritis in diseases classified elsewhere | 0.0 (1)                 |
| F4H1200      | Postinflammatory optic atrophy                           | 0.0 (1)                 |
| FyuJ100      | [X]Retrobulbar neuritis in diseases classified elsewhere | 0.0 (1)                 |
| <b>Total</b> |                                                          | <b>100.0 (2894)</b>     |

**eTable 2.** Time Trend Analysis of the Point Prevalence and Annual Incidence of Optic Neuritis (per 100,000 People) in the UK Between 1997 and 2018

| Year | Prevalent Optic Neuritis | Total patients | Prevalence (95% Confidence Interval) | Incident Optic Neuritis | Person-years at risk | Incidence (100,000 person-years) |
|------|--------------------------|----------------|--------------------------------------|-------------------------|----------------------|----------------------------------|
| 1997 | 127                      | 183385         | 69.25 (57.21-81.29)                  | 14                      | 377852               | 3.71 (1.76-5.65)                 |
| 1998 | 485                      | 670096         | 72.38 (65.94-78.82)                  | 29                      | 824828               | 3.52 (2.24-4.80)                 |
| 1999 | 810                      | 1065766        | 76.00 (70.77-81.23)                  | 50                      | 1163113              | 4.30 (3.11-5.49)                 |
| 2000 | 1084                     | 1333621        | 81.28 (76.45-86.12)                  | 66                      | 1499486              | 4.40 (3.34-5.46)                 |
| 2001 | 1705                     | 2040725        | 83.55 (79.59-87.51)                  | 94                      | 2184168              | 4.30 (3.43-5.17)                 |
| 2002 | 2106                     | 2479272        | 84.94 (81.32-88.57)                  | 118                     | 2750238              | 4.29 (3.52-5.06)                 |
| 2003 | 2611                     | 3107019        | 84.04 (80.81-87.26)                  | 149                     | 3306972              | 4.51 (3.78-5.23)                 |
| 2004 | 2959                     | 3471125        | 85.25 (82.18-88.32)                  | 141                     | 3561914              | 3.96 (3.31-4.61)                 |
| 2005 | 3223                     | 3724667        | 86.53 (83.55-89.52)                  | 173                     | 3900966              | 4.43 (3.77-5.10)                 |
| 2006 | 3610                     | 4091387        | 88.23 (85.36-91.11)                  | 171                     | 4129366              | 4.14 (3.52-4.76)                 |
| 2007 | 3890                     | 4258181        | 91.35 (88.48-94.22)                  | 173                     | 4289268              | 4.03 (3.43-4.63)                 |
| 2008 | 4165                     | 4423710        | 94.15 (91.29-97.01)                  | 167                     | 4543261              | 3.68 (3.12-4.23)                 |
| 2009 | 4667                     | 4744400        | 98.37 (95.55-101.19)                 | 162                     | 4770143              | 3.40 (2.87-3.92)                 |
| 2010 | 4825                     | 4813391        | 100.24 (97.41-103.07)                | 162                     | 4754025              | 3.41 (2.88-3.93)                 |
| 2011 | 4906                     | 4795047        | 102.31 (99.45-105.18)                | 181                     | 4798433              | 3.77 (3.22-4.32)                 |
| 2012 | 5111                     | 4887926        | 104.56 (101.70-107.43)               | 202                     | 4960408              | 4.07 (3.51-4.63)                 |
| 2013 | 5385                     | 5008807        | 107.51 (104.64-110.38)               | 164                     | 4869128              | 3.37 (2.85-3.88)                 |
| 2014 | 5170                     | 4727089        | 109.37 (106.39-112.35)               | 151                     | 4590272              | 3.29 (2.76-3.81)                 |
| 2015 | 4901                     | 4428419        | 110.67 (107.58-113.77)               | 139                     | 4092658              | 3.40 (2.83-3.96)                 |
| 2016 | 4165                     | 3738221        | 111.42 (108.04-114.80)               | 127                     | 3534502              | 3.59 (2.97-4.22)                 |
| 2017 | 3806                     | 3387683        | 112.35 (108.78-115.91)               | 85                      | 3170565              | 2.68 (2.11-3.25)                 |
| 2018 | 3472                     | 3023960        | 114.82 (111.00-118.63)               | 103                     | 2937674              | 3.51 (2.83-4.18)                 |

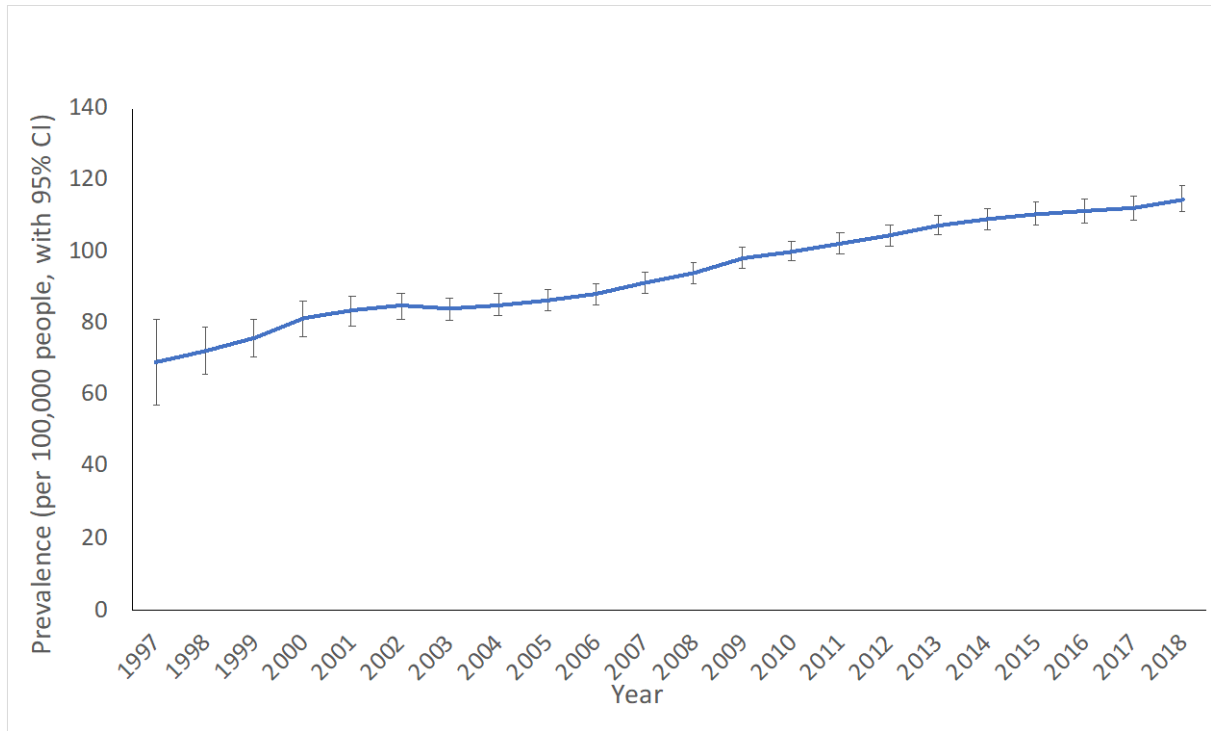

**Figure 1.** Annual Point Prevalence of Optic Neuritis in the UK Population (per 100,000 People, With 95% Confidence Intervals) Between 1997 and 2018



**A**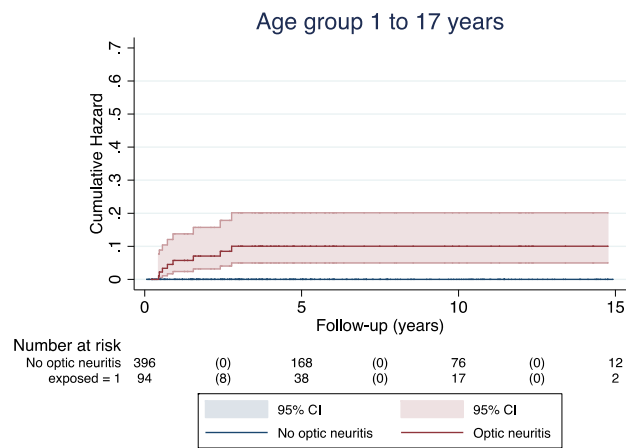**B**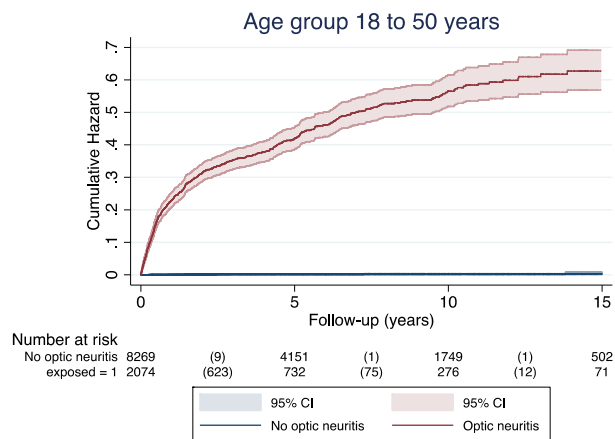**C**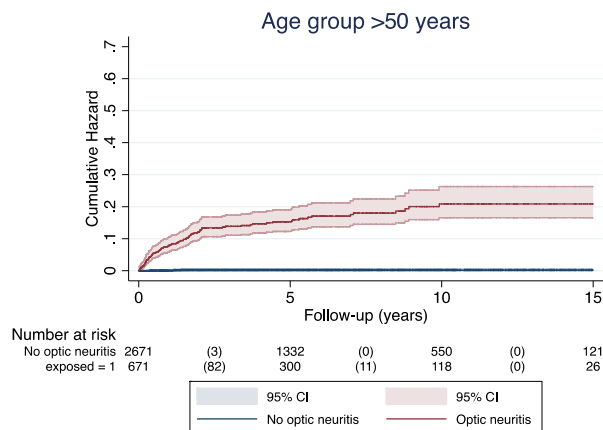

**eFigure 2.** Nelson-Aalen Cumulative Hazard Curves (With 95% Confidence Intervals [CI]) for Diagnosis of Incident Multiple Sclerosis During 15 Years of Follow-up, Comparing Patients Diagnosed With Incident Optic Neuritis A) Aged <17 Years, B) Aged 18-50 Years, and C) Aged >50 Years. Example interpretation: By 10 years follow-up, an estimated 8.5% (n=8/94) with optic neuritis onset aged 1-17 years, 33.7% (n=623+75/2074) with optic neuritis onset aged 18-50 years and 14.8% (n=88+11/671) with optic neuritis onset aged >50 years were diagnosed with multiple sclerosis

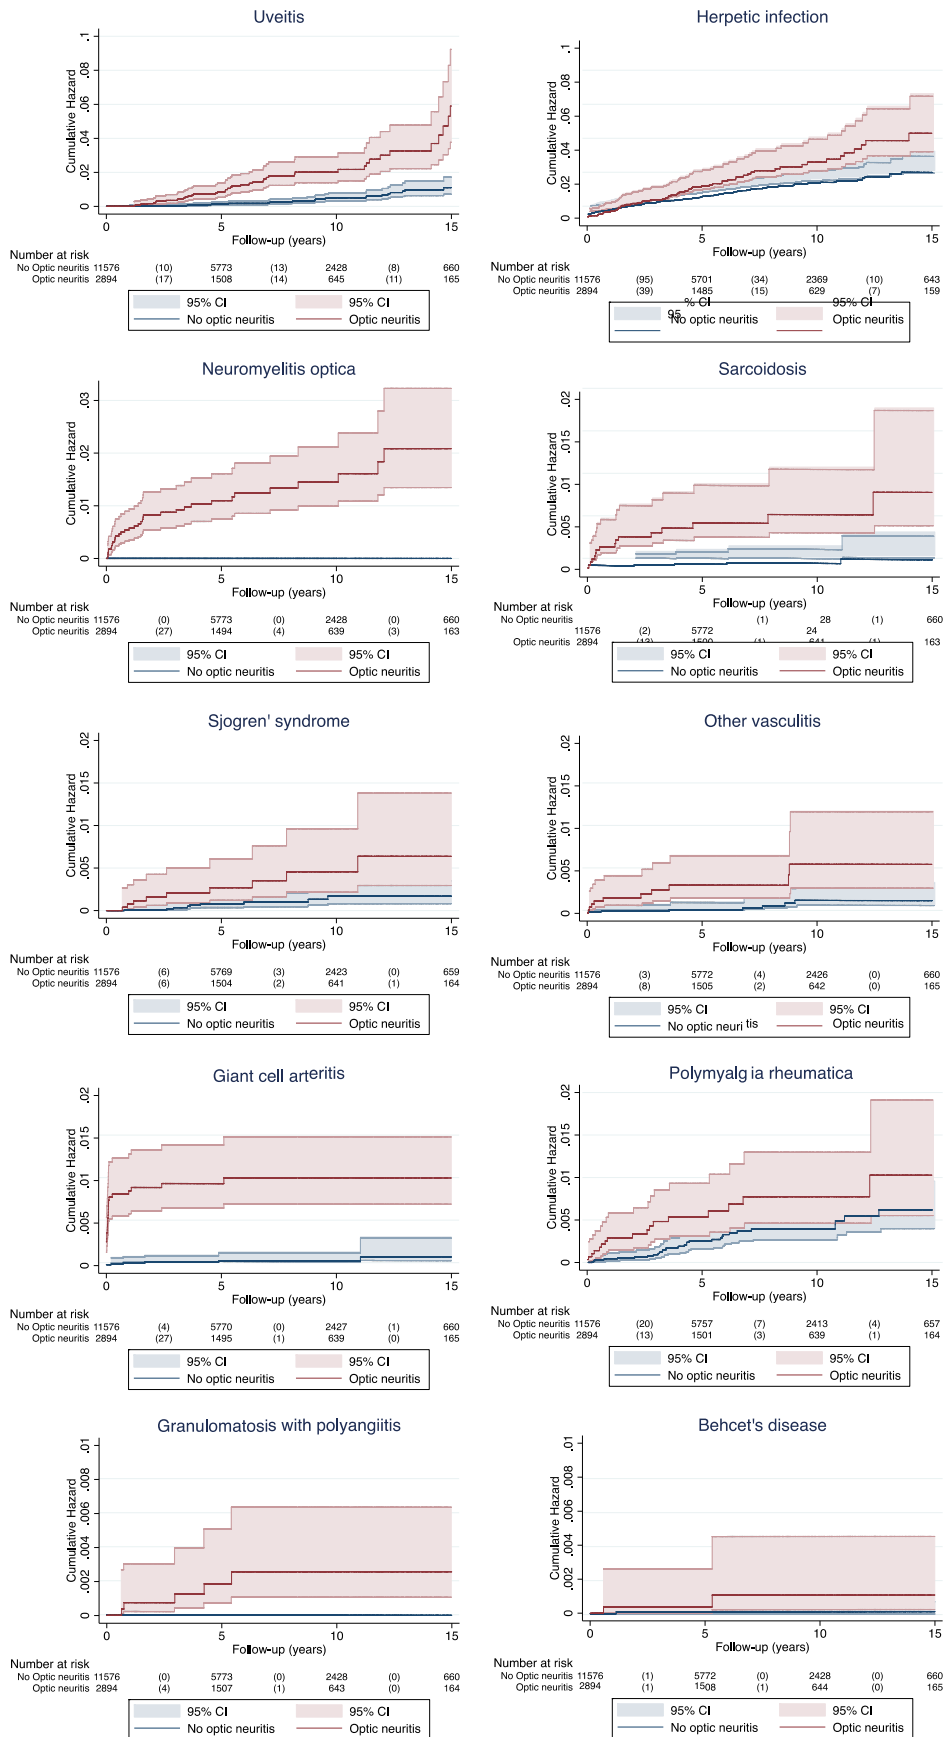

**eFigure 3.** Nelson-Aalen Cumulative Hazard Curves (With 95% Confidence Intervals [CI]) for Diagnosis With Incident Systemic, Neurological or Infectious IMID in Optic Neuritis Patients Compared to Controls During 15 Years of Follow-up. Note differing ranges on y-axes.
